# Supplementary material
Source: HighWire-hosted journal article supplement (https://bmjopen.bmj.com/content/11/5/e042892)
Supplement: inline-supplementary-material-1 [file inline-supplementary-material-1.pdf]

## Additional file 1. CONSORT 2010 Statement: extension to randomised pilot and feasibility trials

### CONSORT checklist of information to include when reporting a pilot trial

| Section/topic and item No  | Standard checklist item                                                                                                               | Extension for pilot trials                                                                                                                          | Page no where item is reported |
|----------------------------|---------------------------------------------------------------------------------------------------------------------------------------|-----------------------------------------------------------------------------------------------------------------------------------------------------|--------------------------------|
| <b>Title and abstract</b>  |                                                                                                                                       |                                                                                                                                                     |                                |
| 1a                         | Identification as a randomised trial in the title                                                                                     | Identification as a pilot or feasibility randomised trial in the title                                                                              | 1                              |
| 1b                         | Structured summary of trial design, methods, results, and conclusions (for specific guidance see CONSORT for abstracts)               | Structured summary of pilot trial design, methods, results, and conclusions (for specific guidance see CONSORT abstract extension for pilot trials) | 2 and Appendix (below)         |
| <b>Introduction</b>        |                                                                                                                                       |                                                                                                                                                     |                                |
| Background and objectives: |                                                                                                                                       |                                                                                                                                                     |                                |
| 2a                         | Scientific background and explanation of rationale                                                                                    | Scientific background and explanation of rationale for future definitive trial, and reasons for randomised pilot trial                              | 3 & 4                          |
| 2b                         | Specific objectives or hypotheses                                                                                                     | Specific objectives or research questions for pilot trial                                                                                           | 4                              |
| <b>Methods</b>             |                                                                                                                                       |                                                                                                                                                     |                                |
| Trial design:              |                                                                                                                                       |                                                                                                                                                     |                                |
| 3a                         | Description of trial design (such as parallel, factorial) including allocation ratio                                                  | Description of pilot trial design (such as parallel, factorial) including allocation ratio                                                          | 4                              |
| 3b                         | Important changes to methods after trial commencement (such as eligibility criteria), with reasons                                    | Important changes to methods after pilot trial commencement (such as eligibility criteria), with reasons                                            | 5                              |
| Participants:              |                                                                                                                                       |                                                                                                                                                     |                                |
| 4a                         | Eligibility criteria for participants                                                                                                 | NA                                                                                                                                                  | NA                             |
| 4b                         | Settings and locations where the data were collected                                                                                  | NA                                                                                                                                                  | NA                             |
| 4c                         |                                                                                                                                       | How participants were identified and consented                                                                                                      | 5                              |
| Interventions:             |                                                                                                                                       |                                                                                                                                                     |                                |
| 5                          | The interventions for each group with sufficient details to allow replication, including how and when they were actually administered | NA                                                                                                                                                  | NA                             |
| Outcomes:                  |                                                                                                                                       |                                                                                                                                                     |                                |

|                                   |                                                                                                                                                                                             |                                                                                                                                                               |       |
|-----------------------------------|---------------------------------------------------------------------------------------------------------------------------------------------------------------------------------------------|---------------------------------------------------------------------------------------------------------------------------------------------------------------|-------|
| 6a                                | Completely defined pre-specified primary and secondary outcome measures, including how and when they were assessed                                                                          | Completely defined pre-specified assessments or measurements to address each pilot trial objective specified in 2b, including how and when they were assessed | 6     |
| 6b                                | Any changes to trial outcomes after the trial commenced, with reasons                                                                                                                       | Any changes to pilot trial assessments or measurements after the pilot trial commenced, with reasons                                                          | NA    |
| 6c                                |                                                                                                                                                                                             | If applicable, pre-specified criteria used to judge whether, or how, to proceed with future definitive trial                                                  | NA    |
| Sample size:                      |                                                                                                                                                                                             |                                                                                                                                                               |       |
| 7a                                | How sample size was determined                                                                                                                                                              | Rationale for numbers in the pilot trial                                                                                                                      | 5     |
| 7b                                | When applicable, explanation of any interim analyses and stopping guidelines                                                                                                                |                                                                                                                                                               |       |
| Randomisation:                    |                                                                                                                                                                                             |                                                                                                                                                               |       |
| Sequence generation:              |                                                                                                                                                                                             |                                                                                                                                                               |       |
| 8a                                | Method used to generate the random allocation sequence                                                                                                                                      |                                                                                                                                                               |       |
| 8b                                | Type of randomisation; details of any restriction (such as blocking and block size)                                                                                                         | Type of randomisation(s); details of any restriction (such as blocking and block size)                                                                        | 5     |
| Allocation concealment mechanism: |                                                                                                                                                                                             |                                                                                                                                                               |       |
| 9                                 | Mechanism used to implement the random allocation sequence (such as sequentially numbered containers), describing any steps taken to conceal the sequence until interventions were assigned | NA                                                                                                                                                            | NA    |
| Implementation:                   |                                                                                                                                                                                             |                                                                                                                                                               |       |
| 10                                | Who generated the random allocation sequence, who enrolled participants, and who assigned participants to interventions                                                                     | NA                                                                                                                                                            | NA    |
| Blinding:                         |                                                                                                                                                                                             |                                                                                                                                                               |       |
| 11a                               | If done, who was blinded after assignment to interventions (for example, participants, care providers, those assessing outcomes) and how                                                    | NA                                                                                                                                                            | NA    |
| 11b                               | If relevant, description of the similarity of interventions                                                                                                                                 | NA                                                                                                                                                            | NA    |
| Analytical methods:               |                                                                                                                                                                                             |                                                                                                                                                               |       |
| 12a                               | Statistical methods used to compare group for primary and secondary outcomes                                                                                                                | Methods used to address each pilot trial objective whether qualitative or quantitative                                                                        | 7 & 8 |
| 12b                               | Methods for additional analyses, such as subgroup analyses and adjusted analyses                                                                                                            | NA                                                                                                                                                            | NA    |

|                                                       |                                                                                                                                                   |                                                                                                                                                                                       |                                              |
|-------------------------------------------------------|---------------------------------------------------------------------------------------------------------------------------------------------------|---------------------------------------------------------------------------------------------------------------------------------------------------------------------------------------|----------------------------------------------|
| <b>Results</b>                                        |                                                                                                                                                   |                                                                                                                                                                                       |                                              |
| Participant flow (a diagram is strongly recommended): |                                                                                                                                                   |                                                                                                                                                                                       |                                              |
| 13a                                                   | For each group, the numbers of participants who were randomly assigned, received intended treatment, and were analysed for the primary outcome    | For each group, the numbers of participants who were approached and/or assessed for eligibility, randomly assigned, received intended treatment, and were assessed for each objective | Figure 1. Schematic diagram of the pilot RCT |
| 13b                                                   | For each group, losses and exclusions after randomisation, together with reasons                                                                  | NA                                                                                                                                                                                    | NA                                           |
| Recruitment:                                          |                                                                                                                                                   |                                                                                                                                                                                       |                                              |
| 14a                                                   | Dates defining the periods of recruitment and follow-up                                                                                           | NA                                                                                                                                                                                    | NA                                           |
| 14b                                                   | Why the trial ended or was stopped                                                                                                                | Why the pilot trial ended or was stopped                                                                                                                                              | NA                                           |
| Baseline data:                                        |                                                                                                                                                   |                                                                                                                                                                                       |                                              |
| 15                                                    | A table showing baseline demographic and clinical characteristics for each group                                                                  | NA                                                                                                                                                                                    | NA                                           |
| Numbers analysed:                                     |                                                                                                                                                   |                                                                                                                                                                                       |                                              |
| 16                                                    | For each group, number of participants (denominator) included in each analysis and whether the analysis was by original assigned groups           | For each objective, number of participants (denominator) included in each analysis. If relevant, these analyses should be by randomised group                                         | Tables 2 and 3                               |
| Outcomes and estimation:                              |                                                                                                                                                   |                                                                                                                                                                                       |                                              |
| 17a                                                   | For each primary and secondary outcome, results for each group, and the estimated effect size and its precision (such as 95% confidence interval) | For each objective, results including expressions of uncertainty (such as 95% confidence interval) for any estimates. If relevant, these results should be by randomised group        | Tables 2 and 3                               |
| 17b                                                   | For binary outcomes, presentation of both absolute and relative effect sizes is recommended                                                       | Not applicable                                                                                                                                                                        |                                              |
| Ancillary analyses:                                   |                                                                                                                                                   |                                                                                                                                                                                       |                                              |
| 18                                                    | Results of any other analyses performed, including subgroup analyses and adjusted analyses, distinguishing pre-specified from exploratory         | Results of any other analyses performed that could be used to inform the future definitive trial                                                                                      | 10 - 12                                      |
| Harms:                                                |                                                                                                                                                   |                                                                                                                                                                                       |                                              |
| 19                                                    | All important harms or unintended effects in each group (for specific guidance see CONSORT for harms)                                             | NA                                                                                                                                                                                    | NA                                           |
| 19a                                                   |                                                                                                                                                   | If relevant, other important unintended consequences                                                                                                                                  | NA                                           |
| <b>Discussion</b>                                     |                                                                                                                                                   |                                                                                                                                                                                       |                                              |
| Limitations:                                          |                                                                                                                                                   |                                                                                                                                                                                       |                                              |

|                          |                                                                                                                  |                                                                                                                                                     |                  |
|--------------------------|------------------------------------------------------------------------------------------------------------------|-----------------------------------------------------------------------------------------------------------------------------------------------------|------------------|
| 20                       | Trial limitations, addressing sources of potential bias, imprecision, and, if relevant, multiplicity of analyses | Pilot trial limitations, addressing sources of potential bias and remaining uncertainty about feasibility                                           | 14               |
| Generalisability:        |                                                                                                                  |                                                                                                                                                     |                  |
| 21                       | Generalisability (external validity, applicability) of the trial findings                                        | Generalisability (applicability) of pilot trial methods and findings to future definitive trial and other studies                                   | 15               |
| Interpretation:          |                                                                                                                  |                                                                                                                                                     |                  |
| 22                       | Interpretation consistent with results, balancing benefits and harms, and considering other relevant evidence    | Interpretation consistent with pilot trial objectives and findings, balancing potential benefits and harms, and considering other relevant evidence | 15               |
| 22a                      |                                                                                                                  | Implications for progression from pilot to future definitive trial including any proposed amendments                                                | 15               |
| <b>Other information</b> |                                                                                                                  |                                                                                                                                                     |                  |
| Registration:            |                                                                                                                  |                                                                                                                                                     |                  |
| 23                       | Registration number and name of trial registry                                                                   | Registration number for pilot trial and name of trial registry                                                                                      | Abstract         |
| Protocol:                |                                                                                                                  |                                                                                                                                                     |                  |
| 24                       | Where the full trial protocol can be accessed, if available                                                      | Where the pilot trial protocol can be accessed, if available                                                                                        | Methods – Design |
| Funding:                 |                                                                                                                  |                                                                                                                                                     |                  |
| 25                       | Sources of funding and other support (such as supply of drugs), role of funders                                  | NA                                                                                                                                                  | NA               |
| 26                       |                                                                                                                  | Ethical approval/research review committee approval confirmed with reference number                                                                 | Methods - Ethics |

### Appendix: Revised version of example abstract for report of pilot trial

| Item           | Standard Checklist item                                                              | Extension for pilot trials                                                                 | Reported |
|----------------|--------------------------------------------------------------------------------------|--------------------------------------------------------------------------------------------|----------|
| Title          | Identification of study as randomised                                                | Identification of study as randomised pilot trial                                          | ✓        |
| Trial design   | Description of the trial design (e.g. parallel, cluster, non-inferiority)            | Description of pilot trial design (e.g. parallel, cluster)                                 | ✓        |
| <b>METHODS</b> |                                                                                      |                                                                                            |          |
| Participants   | Eligibility criteria for participants and the settings where the data were collected | Eligibility criteria for participants and the settings where the pilot trial was conducted | ✓        |
| Interventions  | Interventions intended for each group                                                | <i>same</i>                                                                                | ✓        |
| Objective      | Specific objective or hypothesis                                                     | Specific objectives of the pilot trial                                                     | ✓        |
| Outcome        | Clearly defined primary outcome for this report                                      | Pre-specified assessment or measurement to address the pilot trial objective(s)            | ✓        |

|                    |                                                                                                             |                                                                                                             |    |
|--------------------|-------------------------------------------------------------------------------------------------------------|-------------------------------------------------------------------------------------------------------------|----|
| Randomisation      | How participants were allocated to interventions                                                            | <i>same</i>                                                                                                 | ✓  |
| Blinding (masking) | Whether or not participants, care givers, and those assessing the outcomes were blinded to group assignment | <i>same</i>                                                                                                 | ✓  |
| RESULTS            |                                                                                                             |                                                                                                             |    |
| Numbers randomised | Number of participants randomised to each group                                                             | Number of participants screened and randomised to each group for the pilot trial objective(s) <sup>1</sup>  | ✓  |
| Recruitment        | Trial status (for conference abstracts)                                                                     | <i>same</i>                                                                                                 | NA |
| Numbers analysed   | Number of participants analysed in each group                                                               | Number of participants analysed in each group for the pilot objective(s) <sup>1</sup>                       | ✓  |
| Outcome            | For the primary outcome, a result for each group and the estimated effect size and its precision            | Results for the pilot objective(s), including any expressions of uncertainty                                | ✓  |
| Harms              | Important adverse events or side-effects                                                                    | <i>same</i>                                                                                                 | NA |
| Conclusions        | General interpretation of the results                                                                       | General interpretation of the results of pilot trial and their implications for the future definitive trial | ✓  |
| Trial registration | Registration number and name of trial register                                                              | Registration number for pilot trial and name of trial register                                              | ✓  |
| Funding            | Source of funding                                                                                           | Source of funding for pilot trial                                                                           | ✓  |
